# Supplementary material for: Effect of Muscle Cell Preservation on Viability and Differentiation of Hamstring Tendon Graft In Vitro
Source: MDPI journal article supplement (doi:10.3390/cells10040740), 2021-03-27
Supplement: s1 [file s1]

## **Supplemental figure**

### **Effect of Muscle Cell Preservation on Viability and Differentiation of Hamstring Tendon Graft In Vitro**

Jin Kyu Lee, Sungsin Jo, Young Lim Lee, Subin Weon, Jun-Seob Song, Il-Hoon Sung, Tae-  
Hwan Kim



Supple figure 1

**Figure 1.** ALP staining, activity, and relative mRNA expression were relatively higher in MDC and TDC co-culture than in the TDC group. A total of  $8 \times 10^3$  cells/well (tendon and/or muscle cells, as indicated) were cultured AND assessed by (A) ALP staining (scale bar=200 $\mu$ m), (B) ALP activity, and (C) qPCR for collagen gene expressions.
